# Supplementary material
Source: Springer Nature journal article supplement (https://www.springerprofessional.de/resource/supplementary/40095_2012_14_MOESM4_ESM.pdf/11899642)

**Landfills 10%**   **Recycling 2%**   **Composting 1%**

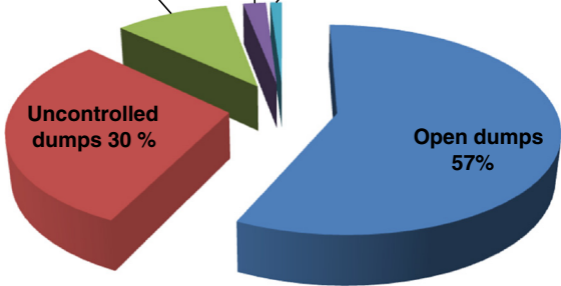

**Uncontrolled  
dumps 30 %**

**Open dumps  
57%**

Supplement: MOESM4 [file 11899642]
